# Supplementary material for: High diagnostic yield in skeletal ciliopathies using massively parallel genome sequencing, structural variant screening and RNA analyses
Source: PubMed Central journal article supplement (PMC8472897; doi:10.1038/s10038-021-00925-x), 2021-04-20
Supplement: 10038_2021_925_MOESM2_ESM.pdf [file 10038_2021_925_MOESM2_ESM.pdf]

### **1.1 Bioinformatic platforms and MPS statistics**

Three different analysis platforms were used, and variants were ranked for presence in coding exons  $\pm 20$  base pairs intronic sequence and with a minor allele frequency of  $< 0.005$  according to public databases (1000G, dbSNP, ExAC/GnomAD) and our local in-house database. *In silico* prediction tools (PolyPhen-2 (<http://genetics.bwh.harvard.edu/pph2>), SIFT (<http://sift.jcvi.org/>), AlignGVGD (<http://agvgd.hci.utah.edu/>), MutationTaster (<http://www.mutationtaster.org/>)), amino acid conservation and variant segregation in the family were used to predict the pathogenicity of the variants. For variant interpretation and splice prediction we used Alamut Visual® (Interactive Biosoftware), ESE-finder (<http://rulai.cshl.edu/>) and RESCUE-ESE (<http://genes.mit.edu>).

### **1.2 MPS Pipelines (supplementary table 3)**

Scout WGS as previously described (18)

Scout exome sequencing (ES) as previously described (17, 19), family

NGI ES as previously described (12).

OGT ES Exome sequencing (for family 2 and 21) using HiSeq2000 (Illumina) was performed with TruSeq v3 Chemistry at Oxford Gene Technology (OGT, Begbroke, UK). Reads were mapped to their location in the human genome (build hg19/b37) using Burrows-wheeler aligner (BWA, [bio-bwa.sourceforge.net](http://bio-bwa.sourceforge.net)) package (version 0.6.2). Realignment of the mapped reads was carried out with GATK (version 1.6) and duplicate reads marked with Picard (version 1.107 [broadinstitute.github.io/picard](http://broadinstitute.github.io/picard)). SNP and indel variants were identified (Samtools 0.1.18, GATK unified genotyper). SNP novelty was annotated according to dbSNP release 135.
