# Supplementary material for: High diagnostic yield in skeletal ciliopathies using massively parallel genome sequencing, structural variant screening and RNA analyses
Source: PubMed Central journal article supplement (PMC8472897; doi:10.1038/s10038-021-00925-x), 2021-04-20
Supplement: 10038_2021_925_MOESM3_ESM.pdf [file 10038_2021_925_MOESM3_ESM.pdf]

| <b>Supplementary Table 1. Short summary of the diagnostic criteria used in the study. Adapted from “Bone dysplasias” by Spranger et al, 4<sup>th</sup> edition.</b> |                   |                                       |                                                 |                                                 |                                                                                                                                                |                                                                          |
|---------------------------------------------------------------------------------------------------------------------------------------------------------------------|-------------------|---------------------------------------|-------------------------------------------------|-------------------------------------------------|------------------------------------------------------------------------------------------------------------------------------------------------|--------------------------------------------------------------------------|
|                                                                                                                                                                     | <b>Short ribs</b> | <b>Polydactyly</b>                    | <b>Brachydactyly with cone-shaped epiphyses</b> | <b>Iliac hypoplasia &amp; trident acetabula</b> | <b>Other Skeletal changes</b>                                                                                                                  | <b>Common extra-skeletal changes</b>                                     |
| <b>ATD Jeune</b>                                                                                                                                                    | +<br>~+++         | Uncommon:<br>postaxial<br>(10%)       | +<br>~+++                                       | +                                               | Metaphyseal irregularity of the proximal femora (occasionally)                                                                                 | Nephronophthisis<br>Hepatic fibrosis                                     |
| <b>SRPS type 1/3</b>                                                                                                                                                | +++               | Common:<br>postaxial                  | +++                                             | +                                               | Mild platyspondyly<br>Ragged metaphyses                                                                                                        | Diverse malformations<br>(brain, heart, liver,<br>kidney, genitourinary) |
| <b>EVC</b>                                                                                                                                                          | +<br>~+++         | Common:<br>postaxial and<br>mesoaxial | ++<br>~++++                                     | +                                               | Bulbous ends of tubular bones<br>Hypoplasia of the lateral portion of the proximal epiphysis with genu valgum<br>Lateral sloping of the humeri | Cardiac anomaly<br>Gum & teeth anomaly                                   |
| <b>CED</b>                                                                                                                                                          | +<br>~++++        | Rare                                  | +<br>~+++                                       | -                                               | Sagittal craniosynostosis<br>Posterior tibial bowing<br>Coat-hanger ribs                                                                       | Sparse hair<br>Nephronophthisis<br>Hepatic fibrosis                      |
| ATD, asphyxiating thoracic dysotrophy; SRPS, short rib polydactyly syndrome; CED, cranioectodermal dysplasia (also named Sensenbrenner syndrome)                    |                   |                                       |                                                 |                                                 |                                                                                                                                                |                                                                          |

| <b>Supplementary Table 2. Genes associated with SRTD, CED and EVC phenotypes and protein localization</b> |                                                    |                                           |                                         |
|-----------------------------------------------------------------------------------------------------------|----------------------------------------------------|-------------------------------------------|-----------------------------------------|
| <b>Gene</b>                                                                                               | <b>Skeletal ciliopathy</b>                         | <b>Other clinical entities</b>            | <b>Localization in cilia</b>            |
| <i>C2CD3</i>                                                                                              | SRTD<br>Cortes et al. (2016)                       | OFD14 [MIM:615948]                        | Basal body component                    |
| <i>C21orf2</i>                                                                                            | SRTD McInerney-Leo et al. (2017)                   | RDMS [MIM:617547]<br>SMDAX [MIM:602271]   | Basal body component                    |
| <i>CEP120</i>                                                                                             | SRTD13 [MIM:616300]                                | JBTS31 [MIM:617761]                       | Basal body component                    |
| <i>CSPP1</i>                                                                                              | SRTD<br>Tuz et al. (2014)                          | JBTS21 [MIM:615636]                       | Basal body component                    |
| <i>DYNC2H1</i>                                                                                            | SRTD3 [MIM:613091]                                 |                                           | IFT dynein subunit                      |
| <i>DYNC2L1</i>                                                                                            | SRTD15 [MIM:617088]                                |                                           | IFT dynein subunit                      |
| <i>EVC</i>                                                                                                | EVC [MIM:225500]<br>WAD [MIM:193530]               |                                           | INV compartment                         |
| <i>EVC2</i>                                                                                               | EVC [MIM:225500]<br>WAD [MIM:193530]               |                                           | INV compartment                         |
| <i>FUZ</i>                                                                                                | SRTD Zhang et al. (2018)                           |                                           | CPLANE complex                          |
| <i>ICK</i>                                                                                                | SRTD Paige Taylor et al (2016)                     | ECO [MIM:612651]                          | IFT cilia regulators                    |
| <i>IFT43</i>                                                                                              | CED3 [MIM:614099]<br>SRTD18 [MIM:617866]           | RP81 [617866]                             | Part of IFT-A                           |
| <i>IFT52</i>                                                                                              | SRTD16 [MIM:617102]                                |                                           | Part of IFT-B                           |
| <i>IFT74*</i>                                                                                             |                                                    | BBS20 [617119]                            | Part of IFT-B                           |
| <i>IFT80</i>                                                                                              | SRTD2 [MIM:611263]                                 |                                           | Part of IFT-B                           |
| <i>IFT81</i>                                                                                              | SRTD19 [MIM:617895]                                |                                           | Part of IFT-B                           |
| <i>IFT122</i>                                                                                             | CED1 [MIM:218330]                                  |                                           | Part of IFT-A                           |
| <i>IFT140</i>                                                                                             | SRTD9 [MIM:266920]                                 | RP80 [MIM:617781]                         | Part of IFT-A                           |
| <i>IFT172</i>                                                                                             | SRTD10 [MIM:615630]                                | RP71 [MIM:616394]                         | Part of IFT-B                           |
| <i>INTU</i>                                                                                               | SRTD20 [MIM: 617926]                               | OFD17 [MIM:617926]                        | CPLANE complex,<br>Basal body component |
| <i>KIAA0586</i>                                                                                           | SRTD14 [MIM:616546]                                | JBTS23 [MIM:616490]                       | Basal body component                    |
| <i>KIAA0753</i>                                                                                           | SRTD with JBTS features<br>Hammarsjö et al. (2017) | OFD15 [MIM:617127]                        | Centriolar satellites                   |
| <i>LBR</i>                                                                                                | SRTD Zhang et al. (2018)                           | GRBGD [MIM:215140]<br>PHA [MIM:169400]    | Unclear                                 |
| <i>NEK1</i>                                                                                               | SRTD6 [MIM:263520]                                 | SMDAX Wang et al. 2017                    | Basal body component                    |
| <i>NEK9</i>                                                                                               | SRTD Casey et al. (2016)                           | LCCS10 [MIM:617022]                       | Unclear                                 |
| <i>TCTEX1D2</i>                                                                                           | SRTD17 [MIM:617405]                                |                                           | IFT dynein subunit                      |
| <i>TRAF3IP1</i>                                                                                           | SRTD Zhang et al. (2018)                           | SLSN9 [MIM:616629]                        | Part of IFT-B<br>CPLANE complex         |
| <i>TTC21B</i>                                                                                             | SRTD4 [MIM:613819]                                 | NPHP12 [MIM:613820]                       | Part of IFT-A                           |
| <i>WDR19</i>                                                                                              | CED4 [MIM:614378]<br>SRTD5 [MIM:614376]            | NPHP13 [MIM:614377]<br>SLSN8 [MIM:616307] | Part of IFT-A                           |
| <i>WDR34</i>                                                                                              | SRTD11 [MIM:615633]                                |                                           | IFT dynein subunit                      |
| <i>WDR35</i>                                                                                              | CED2 [MIM:613610]<br>SRTD7 [MIM:614091]            |                                           | Part of IFT-A                           |
| <i>WDR60</i>                                                                                              | SRTD8 [MIM:615503]                                 |                                           | IFT dynein subunit                      |

\* added to gene list after trio analysis of family 20  
BBS, Bardet-Biedl syndrome; CED, Cranioectodermal dysplasia; CPLANE, ciliogenesis and planar polarity effector; ECO, Endocrine-cerebroosteodysplasia; EVC, Ellis-van Creveld; GRBGD, Greenberg dysplasia; IFT, Intraflagellar transport; INV, Inversin; JBTS, Joubert syndrome; LCCS, Lethal congenital contracture syndrome; MIM, Mendelian Inheritance in Man; NPHP, nephronophthisis; OFD, Orofaciodigital syndrome; RDMS, Retinal dystrophy with macular staphyloma; RP, Retinitis pigmentosa; SLSN, Senior-Loken syndrome; SMDAX, Spondylometaphyseal dysplasia, axial; SRTD, Short-rib thoracic dysplasia; WAD, Weyers acrofacial dysostosis

| <b>Supplementary Table 3. Sequencing statistics</b> |                                         |                              |                           |                           |                          |            |
|-----------------------------------------------------|-----------------------------------------|------------------------------|---------------------------|---------------------------|--------------------------|------------|
| <b>Patient</b>                                      | <b>Total reads<br/>[10<sup>6</sup>]</b> | <b>Mean coverage<br/>[X]</b> | <b>Coverage<br/>[10X]</b> | <b>Coverage<br/>[20X]</b> | <b>MPS<br/>Pipeline*</b> | <b>CNV</b> |
| <b>1</b>                                            | 98.8                                    | 178.3                        | 99.1%                     | 98.4%                     | Scout ES                 | a-CGH      |
| <b>2</b>                                            | 29.2                                    | 67.2                         | 97.5%                     | 92.0%                     | OGT ES                   | a-CGH      |
| <b>3</b>                                            | 84.0                                    | 265.1                        | 99.4%                     | -                         | Scout ES                 | a-CGH      |
| <b>4</b>                                            | -                                       | 37.6                         | 99.5%                     | 96.5%                     | Scout WGS                | SV WGS     |
| <b>5</b>                                            | 70.7                                    | 135.0                        | 98.0%                     | -                         | NGI ES                   | a-CGH      |
| <b>6</b>                                            | -                                       | 293.7                        | 99.5%                     | -                         | Scout ES                 | a-CGH      |
| <b>7</b>                                            | -                                       | 39.2                         | 99.3%                     | -                         | Scout WGS                | SV WGS     |
| <b>8</b>                                            | -                                       | 35.9                         | 99.4%                     | 95.6%                     | Scout WGS                | SV WGS     |
| <b>9</b>                                            | -                                       | 36.4                         | 99.4%                     | 98.9%                     | Scout WGS                | SV WGS     |
| <b>10</b>                                           | -                                       | 37.7                         | 99.4%                     | 98.8%                     | Scout WGS                | SV WGS     |
| <b>11</b>                                           | 76.3                                    | 179.3                        | 98.9%                     | 98.1%                     | Scout ES                 | a-CGH      |
| <b>12</b>                                           | 363.7                                   | 30.9                         | 99.2%                     | 92.8%                     | Scout WGS                | SV WGS     |
| <b>13</b>                                           | -                                       | 34.7                         | 99.3%                     | 95.3%                     | Scout WGS                | SV WGS     |
| <b>14</b>                                           | 499.3                                   | 41.5                         | 99.5%                     | 99.3%                     | Scout WGS                | SV WGS     |
| <b>15</b>                                           | -                                       | 38.4                         | 99.4%                     | 96.1%                     | Scout WGS                | SV WGS     |
| <b>16</b>                                           | -                                       | 39.2                         | 99.4%                     | 96.3%                     | Scout WGS                | SV WGS     |
| <b>17</b>                                           | 292.5                                   | 27.1                         | 98.8%                     | 87.3%                     | Scout WGS                | SV WGS     |
| <b>18</b>                                           | -                                       | 37.9                         | 99.5%                     | 99.3%                     | Scout WGS                | SV WGS     |
| <b>19</b>                                           | -                                       | 36.0                         | 99.5%                     | 99.1%                     | Scout WGS                | SV WGS     |
| <b>20.1</b>                                         | -                                       | 30.6                         | 99.3%                     | 92.7%                     | Scout WGS                | SV WGS     |
| <b>20.2 M</b>                                       | -                                       | 29.8                         | 99.7%                     | 95.3%                     | Scout WGS                | -          |
| <b>20.3 P</b>                                       | -                                       | 30.2                         | 99.2%                     | 96.5%                     | Scout WGS                | -          |
| <b>21</b>                                           | 29.7                                    | 77.9                         | 98.0%                     | 94.5%                     | OGT ES                   | a-CGH      |
| <b>22</b>                                           | -                                       | 34.5                         | 99.5%                     | 98.7%                     | Scout WGS                | SV WGS     |
| <b>23</b>                                           | -                                       | 296.0                        | 99.7%                     | -                         | Scout WES                | a-CGH      |
| <b>24.1</b>                                         | -                                       | 32.1                         | 99.4%                     | 94.1%                     | Scout WGS                | SV WGS     |
| <b>24.2 M</b>                                       | -                                       | 37.9                         | 99.7%                     | 99.4%                     | Scout WGS                | -          |
| <b>24.3 P</b>                                       | -                                       | 36.4                         | 99.6%                     | 95.9%                     | Scout WGS                | -          |
| <b>25</b>                                           | -                                       | 36.7                         | 99.4%                     | 95.8%                     | Scout WGS                | SV WGS     |
| <b>26</b>                                           | -                                       | 39.4                         | 99.1%                     | -                         | Scout WGS                | a-CGH/SV   |
| <b>27.1</b>                                         | -                                       | 30.6                         | 99.1%                     | 96.4%                     | Scout WGS                | a-CGH/SV   |
| <b>27.2 M</b>                                       | -                                       | 38.6                         | 99.7%                     | 99.5%                     | Scout WGS                | -          |
| <b>27.3 P</b>                                       | -                                       | 35.1                         | 99.6%                     | 95.5%                     | Scout WGS                | -          |
| <b>28.1</b>                                         | -                                       | 37.9                         | 99.7%                     | 99.4%                     | Scout WGS                | SV WGS     |
| <b>28.2 M</b>                                       | -                                       | 35.7                         | 99.7%                     | 99.2%                     | Scout WGS                | SV WGS     |
| <b>28.3 P</b>                                       | -                                       | 35.4                         | 99.6%                     | 95.6%                     | Scout WGS                | SV WGS     |
| <b>29.1</b>                                         | -                                       | 34.7                         | 99.7%                     | 98.9%                     | Scout WGS                | a-CGH/SV   |
| <b>29.2 M</b>                                       | -                                       | 48.7                         | 94.7%                     | 84.5%                     | Scout WGS                | a-CGH/SV   |
| <b>29.3 P</b>                                       | -                                       | 49.3                         | 94.8%                     | 84.6%                     | Scout WGS                | a-CGH/SV   |

\*see explanation of pipelines in section 1.2 in supplementary information  
Based on the entire coding regions defined by HGNC of refGene hg19/build37  
a-CGH, array comparative genome hybridization; CNV, Copy number variation; M, maternal; NGI, National Genomics Infrastructure; OGT, Oxford genome technology; P, paternal; S, affected sibling; SV, structural variant; ES, exome sequencing; WGS, whole genome sequencing

| Supplementary Table 4. Radiographic features of patients |           |                |                  |                     |            |            |                |                     |                  |              |             |               |                              |
|----------------------------------------------------------|-----------|----------------|------------------|---------------------|------------|------------|----------------|---------------------|------------------|--------------|-------------|---------------|------------------------------|
| Family                                                   | Age & sex | Diagnosis      | Craniosynostosis | Thoracic hypoplasia | Short ribs | Short ilia | Trident pelvis | Short tubular bones | Broad metaphyses | Bowed femora | Polydactyly | Brachydactyly | Additional information       |
| 1                                                        | † 2d F    | ATD            | -                | +                   | +          | +          | +              | +                   | +                | -            | -           | +             |                              |
|                                                          | † 8d M    | ATD            | -                | +                   | +          | +          | +              | +                   | +                | -            | -           | +             |                              |
| 2                                                        | TOP M     | ATD            | -                | +                   | +          | +          | +              | +                   | +                | +            | -           | +             | Syndactyly of the hands      |
| 3                                                        | TOP M     | SRPS3          | -                | +                   | +          | +          | +              | +                   | +                | +            | +           | +             | Scoliosis, lumbar lordosis   |
| 4                                                        | 2y M      | ATD            | -                | +                   | +          | +          | +              | +                   | +                | +            | -           | +             |                              |
| 5                                                        | 6y M      | ATD            | -                | +                   | +          | +          | +              | +                   | +                | -            | -           | +             |                              |
| 6                                                        | TOP M     | ATD            | -                | +                   | +          | +          | +              | +                   | +                | +            | -           | +             |                              |
| 7                                                        | TOP F     | ATD            | -                | +                   | +          | +          | +              | +                   | +                | +            | -           | +             | <i>Coxa vara</i>             |
| 8                                                        | TOP M     | SRPS3          | -                | +                   | +          | +          | +              | +                   | +                | +            | +           | +             | Syndactyly (hands and feet)  |
| 9                                                        | TOP F     | SRPS3          | +                | +                   | +          | +          | +              | +                   | +                | +            | +           | +             |                              |
| 10                                                       | TOP M     | ATD            | -                | +                   | +          | +          | +              | +                   | +                | +            | -           | +             |                              |
| 11                                                       | 3y M      | ATD            | -                | +                   | +          | +          | +              | +                   | +                | -            | -           | +             |                              |
| 12                                                       | 3y M      | ATD            | -                | +                   | +          | +          | +              | +                   | +                | +            | -           | +             |                              |
|                                                          | † 2d M    | ATD            | -                | +                   | +          | +          | +              | +                   | na               | na           | -           | +             |                              |
| 13                                                       | TOP M     | SRPS3          | -                | +                   | +          | +          | +              | +                   | -                | +            | -           | +             | Brachycephaly                |
| 14                                                       | † 2d M    | ATD            | -                | +                   | +          | +          | +              | +                   | -                | -            | -           | +             |                              |
|                                                          | † 4m F    | ATD            | -                | +                   | +          | +          | +              | +                   | -                | -            | -           | +             |                              |
| 15                                                       | † 2m M    | ATD + JBTS     | -                | +                   | +          | +          | +              | +                   | +                | -            | -           | +             |                              |
|                                                          | TOP NA    | ATD + JBTS     | -                | +                   | +          | +          | +              | +                   | +                | -            | -           | +             |                              |
| 16                                                       | 2y M      | ATD            | -                | +                   | +          | +          | +              | +                   | -                | -            | -           | +             |                              |
| 17                                                       | 7y M      | ATD            | -                | +                   | +          | +          | +              | +                   | -                | -            | -           | +             |                              |
| 18                                                       | 18y M     | ATD            | +                | +                   | +          | -          | +              | +                   | +                | +            | -           | +             |                              |
| 19                                                       | † 2y F    | ATD            | +                | +                   | +          | -          | +              | +                   | +                | +            | -           | +             | Dolichocephaly               |
| 20                                                       | † 7d M    | ATD            | -                | +                   | +          | +          | +              | +                   | -                | -            | -           | +             | Scaphocephaly                |
| 21                                                       | † 10m F   | CED            | +                | +                   | +          | -          | -              | +                   | -                | -            | -           | +             | Macrocephaly, dolichocephaly |
| 22                                                       | TOP M     | EVC            | -                | +                   | +          | +          | +              | +                   | -                | -            | +           | +             | Syndactyly of left foot      |
| 23                                                       | 17y3m M   | EVC            | -                | +                   | +          | +          | na             | +                   | -                | -            | +           | +             |                              |
| 24                                                       | 4y4m M    | EVC            | -                | +                   | +          | +          | +              | +                   | +                | +            | +           | +             | Camptodactyly of thumbs      |
| 25                                                       | † 1d M    | unclassifiable | -                | +                   | +          | +          | -              | +                   | +                | +            | +           | +             |                              |
| 26                                                       | 5y M      | unclassifiable | -                | +                   | +          | -          | -              | +                   | -                | -            | -           | +             | Brachycephaly                |
| 27                                                       | † 1d M    | ATD            | -                | +                   | +          | +          | +              | +                   | -                | +            | -           | +             |                              |
| 29                                                       | 3m F      | ATD            | -                | +                   | +          | +          | +              | +                   | -                | -            | -           | +             |                              |
| 29                                                       | † 1d M    | CED            | +                | +                   | +          | -          | -              | +                   | -                | -            | -           | +             |                              |
|                                                          | 2y4m F    | CED            | +                | +                   | +          | -          | -              | +                   | -                | -            | -           | +             |                              |

†, diseased; +, present; -, absent; ATD, asphyxiating thoracic dystrophy; CED, Cranioectodermal dysplasia; d, days; EVC, Ellis-van Creveld syndrome; F, female; JBTS, Joubert syndrome; m, months; M, male; na, not available; TOP, termination of pregnancy; SRPS3, short-rib polydactyly syndrome type 3; y, years

| <b>Supplementary Table 5. Variants with genomic position and ACMG classification</b> |                                     |             |
|--------------------------------------------------------------------------------------|-------------------------------------|-------------|
| <b>Variant</b>                                                                       | <b>Genomic position</b>             | <b>ACMG</b> |
| NM_001080463.1(DYNC2H1):c.7919T>C                                                    | Chr11(GRCh37):g.103070036T>C        | 4           |
| NM_001080463.1(DYNC2H1):c.9865G>A                                                    | Chr11(GRCh37):g.103114446G>A        | 4           |
| NM_001080463.1(DYNC2H1):c.12602C>T                                                   | Chr11(GRCh37):g.103327017C>T        | 3           |
| NM_001080463.1(DYNC2H1):c.8003T>G                                                    | Chr11(GRCh37):g.103070120T>G        | 3           |
| NM_001080463.1(DYNC2H1):c.9044A>G                                                    | Chr11(GRCh37):g.103091449A>G        | 5           |
| NM_001080463.1(DYNC2H1):c.6910G>A                                                    | Chr11(GRCh37):g.103058085G>A        | 4           |
| NM_001080463.1(DYNC2H1):c.8444G>A                                                    | Chr11(GRCh37):g.103075683G>A        | 3           |
| NM_001080463.1(DYNC2H1):c.5971A>T                                                    | Chr11(GRCh37):g.103048381A>T        | 3           |
| NM_001080463.1(DYNC2H1):c.11284A>G                                                   | Chr11(GRCh37):g.103175330A>G        | 4           |
| NM_001080463.1(DYNC2H1):c.5682_5683del                                               | Chr11(GRCh37):g.103046971-103046972 | 5           |
| NM_001080463.1(DYNC2H1):c.5771A>T                                                    | Chr11(GRCh37):g.103047060A>T        | 3           |
| NM_001080463.1(DYNC2H1):c.729T>A                                                     | Chr11(GRCh37):g.102987406T>A        | 5           |
| NM_001080463.1(DYNC2H1):c.1855C>T                                                    | Chr11(GRCh37):g.102996022C>T        | 5           |
| NM_001080463.1(DYNC2H1):c.2386del                                                    | Chr11(GRCh37):g.103006489del        | 5           |
| NM_001080463.1(DYNC2H1):c.10163C>T                                                   | Chr11(GRCh37):g.103124113C>T        | 4           |
| NM_001080463.1(DYNC2H1):c.624_625delinsAA                                            | Chr11(GRCh37):g.102987301-102987302 | 4           |
| NM_001080463.1(DYNC2H1):c.2574+1G>A                                                  | Chr11(GRCh37):g.103006678G>A        | 5           |
| NM_001080463.1(DYNC2H1):c.7129T>G                                                    | Chr11(GRCh37):g.103058304T>G        | 3           |
| NM_001080463.1(DYNC2H1):c.6478-16G>A                                                 | Chr11(GRCh37):g.103055609G>A        | 4           |
| NM_001080463.1(DYNC2H1):c.1306G>T                                                    | Chr11(GRCh37):g.102991711G>T        | 5           |
| NM_001080463.1(DYNC2H1):c.11070G>A                                                   | Chr11(GRCh37):g.103158288G>A        | 4           |
| NM_001080463.1(DYNC2H1):c.1366C>T                                                    | Chr11(GRCh37):g.102992106C>T        | 5           |
| NM_001080463.1(DYNC2H1):c.3455T>C                                                    | Chr11(GRCh37):g.103025332T>C        | 3           |
| NM_001080463.1(DYNC2H1):c.5690T>C                                                    | Chr11(GRCh37):g.103046979T>C        | 3           |
| NM_001080463.1(DYNC2H1):c.8354C>A                                                    | Chr11(GRCh37):g.103075593C>A        | 3           |
| NM_015531.6(C2CD3):c.5227G>T                                                         | Chr11(GRCh37):g.73760516C>A         | 3           |
| NM_015531.6(C2CD3):c.5267G>A                                                         | Chr11(GRCh37):g.73760476C>T         | 3           |
| NM_014804.3(KIAA0753):c.810C>T                                                       | Chr17(GRCh37):g.6528090G>A          | 5           |
| NM_014804.3(KIAA0753):c.970C>T                                                       | Chr17(GRCh37):g.6526336G>A          | 5           |
| NM_024753.5(TTC21B):c.2758-2A>G                                                      | Chr2(GRCh37):g.166756392T>C         | 5           |
| NM_024753.5(TTC21B):c.3857T>C                                                        | Chr2(GRCh37):g.166732691A>G         | 3           |
| NM_025132.4(WDR19):c.56T>G                                                           | Chr4(GRCh37):g.39187395T>G          | 4           |
| NM_025132.4(WDR19):c.3868_3871del                                                    | Chr4(GRCh37):g.39279778-39279781    | 5           |
| NM_025132.4(WDR19):c.974T>C                                                          | Chr4(GRCh37):g.39217473T>C          | 3           |
| NM_025132.4(WDR19):c.3758G>A                                                         | Chr4(GRCh37):g.39278681G>A          | 3           |
| NM_025132.4(WDR19):c.1623C>G                                                         | Chr4(GRCh37):g.39226647C>G          | 5           |
| NM_025132.4(WDR19):c.3533G>A                                                         | Chr4(GRCh37):g.39274649G>A          | 5           |
| NM_001306090.1(EVC):c.1018C>T                                                        | Chr4(GRCh37):g.5749953C>T           | 5           |
| NM_001306090.1(EVC):c.175-9G>A                                                       | Chr4(GRCh37):g.5720966G>A           | 4           |
| NM_147127.5(EVC2):c.571A>G                                                           | Chr4(GRCh37):g.5691019T>C           | 3           |

| <b>Continued: Supplementary Table 6. Variants with genomic position and ACMG classification</b> |                                     |             |
|-------------------------------------------------------------------------------------------------|-------------------------------------|-------------|
| <b>Variant</b>                                                                                  | <b>Genomic position</b>             | <b>ACMG</b> |
| NM_002730.4(PRKACA):c.409G>A                                                                    | Chr19(GRCh37):g.14211648C>T         | 5           |
| NM_001080463.1(DYNC2H1):c.10022C>G                                                              | Chr11(GRCh37):g.103116062C>G        | 3           |
| NM_025103.3(IFT74)                                                                              | Chr9(GRCh37):g.26959922-26962969    | 4           |
| NM_001080463.1(DYNC2H1)                                                                         | Chr11(GRCh37):g.103016481-103177263 | 5           |
| NC_000001.11(1q24q25)                                                                           | Chr1(GRCh37):g.169095250-175778910  | 5           |

| <b>Supplementary Table 6. Candidate variants for the unsolved probands after filtering WGS-trio data (GRCh37)</b> |                        |                       |                     |                           |                    |             |                            |                     |                                                  |
|-------------------------------------------------------------------------------------------------------------------|------------------------|-----------------------|---------------------|---------------------------|--------------------|-------------|----------------------------|---------------------|--------------------------------------------------|
| <b>Family</b>                                                                                                     | <b>Gene</b>            | <b>Refseq</b>         | <b>Nucleotide</b>   | <b>Amino acid</b>         | <b>Inheritance</b> | <b>CADD</b> | <b>Genomic coordinates</b> | <b>Gene OMIM</b>    | <b>Comments</b>                                  |
| <b>27</b>                                                                                                         | <b><i>DYNC2H1</i></b>  | <b>NM_001080463.2</b> | <b>c.1540C&gt;T</b> | <b>p.(Arg514*)</b>        | <b>Paternal</b>    | <b>37</b>   | <b>11:102993608</b>        | <b>603297</b>       | <b>No plausible compound</b>                     |
|                                                                                                                   | <i>FN3KRP</i>          | NM_024619.4           | c.199dup            | p.(Thr67Asnfs*47)         | Homozygous         | 29          | 17:80676838                |                     | MAF in SAS pop<br>gnomAD 0.4%                    |
|                                                                                                                   | <i>ADGRE2</i>          | NM_001271052          | c.1416+3G>C         | p.(?)                     | Paternal           | 16          | 19:14866463                | 606100              |                                                  |
|                                                                                                                   |                        |                       | c.781+5G>A          | p.(?)                     | Maternal           | 4           | 19:14876465                | 606100              |                                                  |
|                                                                                                                   | <i>B9DI</i>            | NM_015681.6           | c.467G>C            | p.(Arg156Pro)             | Maternal           | 30          | 17:19247108                | 614144              | No plausible compound                            |
|                                                                                                                   | <i>PKN3</i>            | NM_013355.5           | c.779C>T            | p.(Ala260Val)             | de novo            | 18          | 9:131469628                |                     | Only 6/31 reads                                  |
| <i>PKHD1</i>                                                                                                      | NM_138694.4            | c.11377G>T            | p.(Ala3793Ser)      | de novo                   | 0                  | 6:51512850  | 606702                     | Known in AR disease |                                                  |
| <b>28</b>                                                                                                         | <b><i>KIAA0586</i></b> | <b>NM_014749</b>      | <b>c.3170del</b>    | <b>p.(Leu1057Cysfs*9)</b> | <b>Maternal</b>    | <b>26</b>   | <b>14:58954695</b>         | <b>610178</b>       | <b>No plausible compound</b>                     |
|                                                                                                                   | <i>ADAP1</i>           | NM_006869             | c.580G>A            | p.(Gly194Ser)             | de novo            | 25          | 7:943831                   |                     |                                                  |
|                                                                                                                   | <i>APOB</i>            | NM_000384.3           | c.4838G>C           | p.(Ser1613Thr)            | Paternal           | 13          | 2:21234902                 | 107730              |                                                  |
| c.10427C>A                                                                                                        |                        |                       | p.(Ala3476Glu)      | Maternal                  | 0                  | 2:21229313  | 107730                     |                     |                                                  |
| <b>29</b>                                                                                                         | <b><i>TTC21B</i></b>   | <b>NM_024753.5</b>    | <b>c.2569G&gt;A</b> | <b>p.(Ala857Thr)</b>      | <b>Maternal</b>    | <b>33</b>   | <b>2:166758420</b>         | <b>612014</b>       | <b>No plausible compound</b>                     |
|                                                                                                                   | <b><i>IFT122</i></b>   | <b>NM_018262.4</b>    | <b>c.1306G&gt;A</b> | <b>p.(Gly436Arg)</b>      | <b>Paternal</b>    | <b>32</b>   | <b>3:129198760</b>         | <b>606045</b>       | <b>No plausible compound;<br/>PMID: 23826986</b> |
|                                                                                                                   | <i>PIEZO1</i>          | NM_001142864.4        | c.6592C>T           | p.(Arg2198Cys)            | de novo            | 26          | 16:88783499                | 611184              |                                                  |
|                                                                                                                   | <i>KCTD17</i>          | NM_024681.3           | c.834del            | p.(Lys278Asnfs*69)        | de novo            | 33          | 22:37458573                | 616386              | Only 5/30 reads                                  |
|                                                                                                                   | <i>NOS2</i>            | NM_000625             | c.595C>T            | p.(Arg199Cys)             | Paternal           | 27          | 17:26110005                | 163730              |                                                  |
|                                                                                                                   |                        |                       | c.1509C>A           | p.(Asp503Glu)             | Maternal           | 7           | 17:26100237                | 163730              |                                                  |
| <i>HMCN1</i>                                                                                                      | NM_031935.3            | c.5706C>T             | p.(Asn1902=)        | Maternal                  | 9                  | 1:185992242 | 608548                     |                     |                                                  |
|                                                                                                                   |                        | c.7955C>T             | p.(Ala2652Val)      | Paternal                  | 26                 | 1:186038870 | 608548                     |                     |                                                  |

Trio-analysis against all genes GRCh37 with autosomal dominant (de novo) inheritance, autosomal recessive inheritance (compound heterozygous or homozygous) and X-linked inheritance. Variants in known cilia genes with autosomal recessive inheritance when no plausible compound was found is marked as bold.
